# Supplementary material
Source: publisher site journal article supplement (https://www.dovepress.com/article/536476)

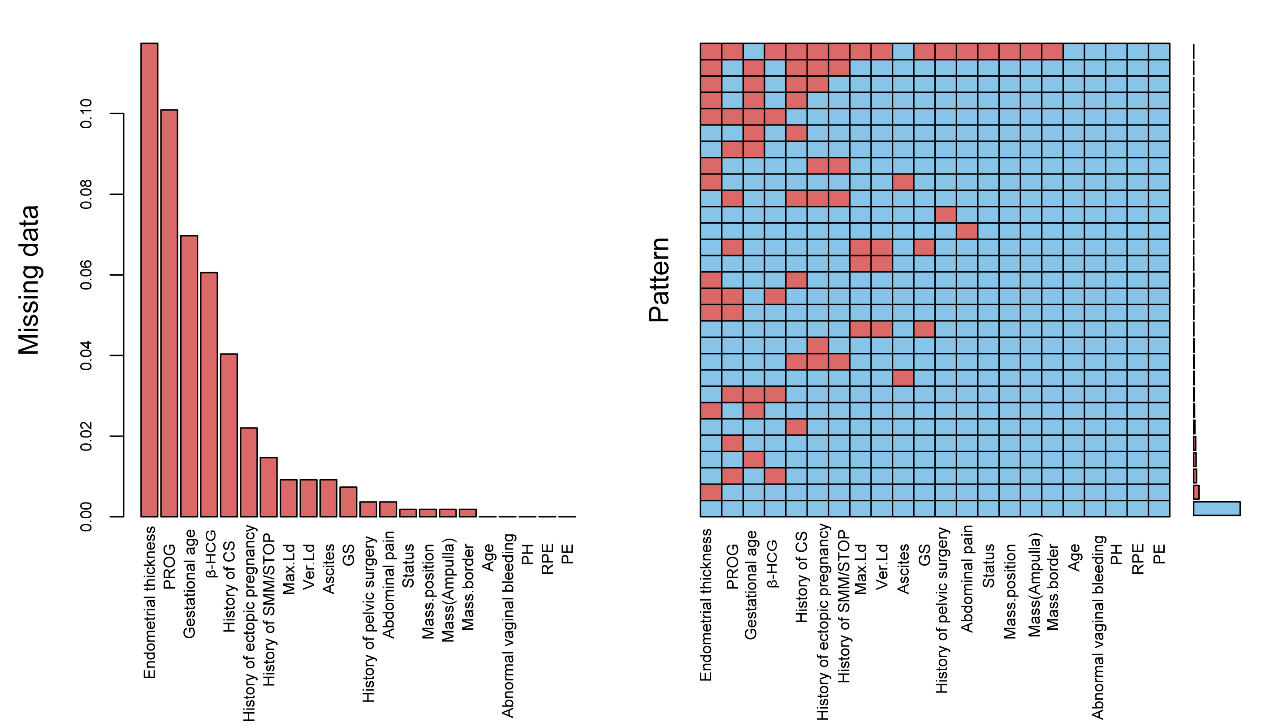


Fig S1 Missing value analysis diagram


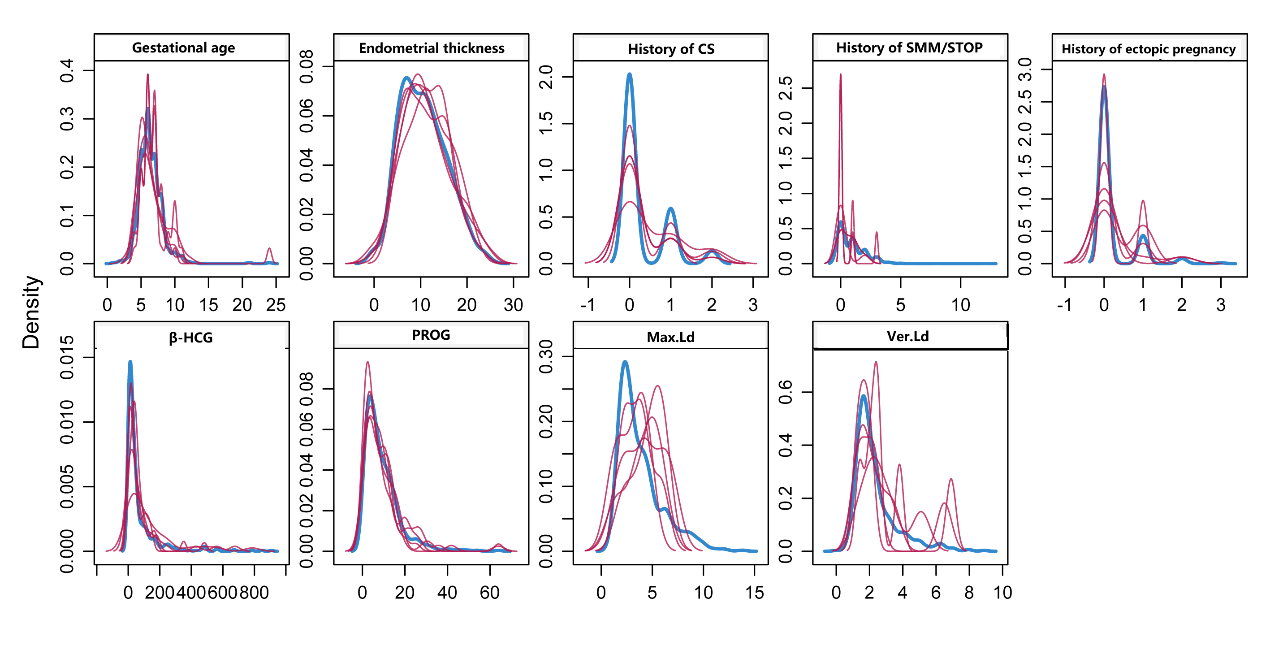


Fig S2 Multiple interpolation analysis chart

Supplement: Supplementary file 1 [file 536476%20Supplementary%20Material.docx]
